# Supplementary material
Source: HighWire-hosted journal article supplement (https://jama.ama-assn.org/content/suppl/2009/07/13/301.21.2290)
Supplement: pdfpat060309.pdf [file pdfpat060309.pdf]

# Bebés prematuros

Durante el embarazo, el bebé crece en el **útero** (matriz) materno, generalmente, durante 38 a 40 semanas. Cuando un bebé nace en forma **prematura** (mucho antes de lo debido), es posible que requiera atención médica especial. El nivel de atención adicional necesario, con frecuencia, depende de cuánto antes ocurre el nacimiento. El peso de los bebés prematuros (también llamados **nacidos antes de término**) es mucho menor que el de los nacidos a término porque no tuvieron la cantidad de tiempo necesaria para crecer dentro del útero.

Los bebés nacidos en una etapa muy temprana del embarazo son extremadamente pequeños y frágiles. Es posible que su peso sea menor que 2 libras. Requieren cuidados intensivos especializados en una **unidad de cuidados intensivos neonatales (neonatal intensive care unit, NICU)**. Los médicos y los enfermeros que trabajan en la NICU cuentan con la capacitación especializada para atender a los bebés prematuros y sus problemas. Es posible que los problemas de salud de los bebés prematuros no terminen cuando vuelven a su hogar luego del alta hospitalaria. Quizás necesiten atención médica especial a medida que crecen.

El número de JAMA del 3 de junio de 2009 es un número temático acerca de la salud en niños y adolescentes, e incluye un artículo acerca de la supervivencia de bebés nacidos mucho antes de término en Suecia. Esta Hoja para el Paciente está adaptada de un número publicado el 26 de marzo de 2008.

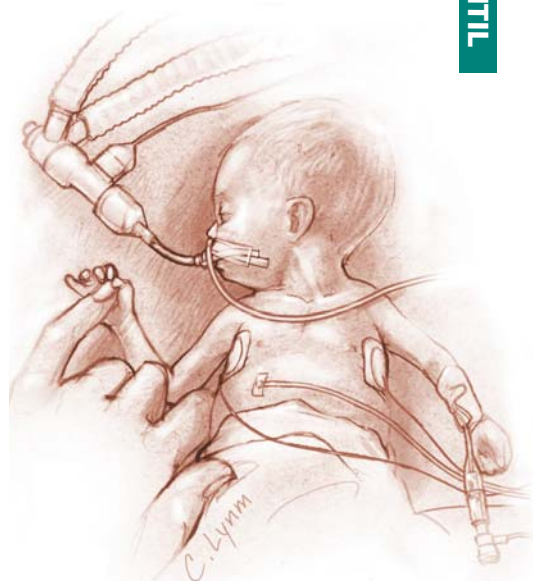

## PROBLEMAS INICIALES DE LOS BEBÉS PREMATUROS

- Incapacidad de respirar o de respirar regularmente por sus propios medios, dado que sus pulmones no están completamente desarrollados
- Regulación de la temperatura corporal (el bebé no puede mantener su temperatura corporal)
- Problemas de alimentación y crecimiento, dado que cuentan con un sistema digestivo inmaduro
- **Ictericia** (coloración amarilla de la piel y posible daño cerebral, como consecuencia de la acumulación de **bilirrubina**, un producto de degradación de la sangre)
- **Anemia** (recuento insuficiente de glóbulos rojos para transportar oxígeno a los tejidos)
- **Hemorragia intracraneal** (sangrado en el cerebro)

## PROBLEMAS QUE LOS BEBÉS PREMATUROS PUEDEN ENFRENTAR A MEDIDA QUE CRECEN

- **Apnea** (episodios en los que dejan de respirar), que posiblemente requiera un monitoreo especial, incluso en el hogar
- **Displasia broncopulmonar**, una enfermedad pulmonar crónica que puede mejorar o no a medida que el niño crece
- Problemas auditivos o de la visión relacionados con nervios inmaduros o con efectos secundarios del tratamiento
- Retrasos en el desarrollo y discapacidades de aprendizaje, como consecuencia del daño cerebral provocado por la inmadurez

Dado que los bebés prematuros, en especial los que son extremadamente prematuros, pueden estar gravemente enfermos, puede resultar difícil para los padres, médicos y enfermeros tomar decisiones acerca de los tratamientos. Los estudios de investigación médica brindan información acerca de los tratamientos y del curso probable de una enfermedad, pero no pueden predecir cómo se recuperará cada bebé que nace mucho antes de lo debido.

Recibir atención médica regular **prenatal** (antes del nacimiento), evitar cualquier exposición al humo del tabaco, evitar el alcohol y las sustancias ilegales y controlar los problemas médicos crónicos son cuestiones importantes durante cualquier embarazo.

Janet M. Torpy, MD, Redactora

Cassio Lynn, MA, Ilustrador

Richard M. Glass, MD, Editor

La Hoja para el Paciente de JAMA es un servicio al público de JAMA. La información y las recomendaciones que aparecen en esta hoja son adecuadas en la mayoría de los casos, pero no reemplazan el diagnóstico médico. Para obtener información específica relacionada con su afección médica personal, JAMA le sugiere que consulte a su médico. Los médicos y otros profesionales de atención médica pueden fotocopiar esta hoja con fines no comerciales para compartirla con pacientes. Para comprar reimpressiones en grandes cantidades, llame al 312/464-0776.

## PARA OBTENER MÁS INFORMACIÓN

- American Academy of Pediatrics (Academia Americana de Pediatría) <http://www.aap.org/>
- Eunice Kennedy Shriver National Institute of Child Health and Human Development (Instituto Nacional de Salud Infantil y Desarrollo Humano Eunice Kennedy Shriver) <http://www.nichd.nih.gov>
- Nemours Foundation's Center for Children's Health Media (Centro para la Comunicación de la Salud Infantil de la Fundación Nemours) <http://www.kidshealth.org>

## INFÓRMESE

Para encontrar esta y otras Hojas para el Paciente de JAMA anteriores, vaya al enlace Patient Page (Hoja para el Paciente) del sitio web de JAMA en <http://www.jama.com>. Muchas están disponibles en inglés y español.

Fuentes: American Academy of Pediatrics, Eunice Kennedy Shriver National Institute of Child Health and Human Development, Nemours Foundation (KidsHealth)

**JAMA**  
COPIA PARA  
SUS PACIENTES
